# Supplementary material for: Palladium or platinum complex catalysed reactions of carbonyl and imine compounds with disilanesElectronic supplementary information (ESI) available: characterization data of the silicon-containing products obtained in the catalytic reactions. See http://www.rsc.org/suppdata/dt/b2/b207987a/
Source: Royal Society of Chemistry journal article supplement (doi:10.1039/b207987a), 2002-12-12
Supplement: b207987a.doc [file b207987a.doc]

Palladium or platinum complex catalysed reactions of carbonyl and imine compounds with disilanes

**Neil A. Williams,****a* **Yuko Uchimaru***b* **and Masato Tanaka****b,c*

*a School of Chemical and Pharmaceutical Sciences, Kingston University, Kingston upon Thames, KT1 2EE, UK*

*b National Institute of Advanced Industrial Science and Technology, Tsukuba Central 5, Ibaraki 305-8565, Japan*

*c Chemical Resources Laboratory, Tokyo Institute of Technology, 4259 Nagatsuta, Midori-ku, Yokohama 226-8503, Japan*

# Supplementary information

Spectral and other characterization data of the silicon-containing products obtained in the catalytic reactions are as follows.

**Compound 3a.** Isolated by preparative GLC. ** (C6D6)-0.05 (3H, d, *J*(H-F) = 6.2 Hz, Si*Me*F), 0.01 (3H, d, *J*(H-F) = 7.0 Hz, Si*Me*F), 0.08 (3H, d, *J*(H-F) = 6.0 Hz, Si*Me*F), 0.18 (3H, d, *J*(H-F) = 7.1 Hz, Si*Me*F), 4.74 (1H, s, Si-C*H*-O), 7.23-7.0 (5H, m, aromatic). **C (C6D6) - 4.7 (d, *J*(C-F) = 14.1 Hz, Si*Me*F), -4.3 (d, *J*(C-F) = 14.0 Hz, Si*Me*F), -3.1 (d, *J*(C-F) = 19.1 Hz, Si*Me*F), -2.8 (d, *J*(C-F) = 18.2 Hz, Si*Me*F), 69.5 (d, *J*(C-F) = 16.9 Hz, Si-*C*H-O), 125.3 (2C), 126.6, 128.6 (2C), 142.1 (*ipso*-C). **Si (C6D6) 3.4 (d, *J*(Si-F) = 287 Hz, O-*Si*Me2F), 22.2 (d, *J*(Si-F) = 292 Hz, C-*Si*Me2F). IR (neat, cm-1): 1512, 1255, 1064, 1038, 872. MS (EI): *m/z* 260 (M+), 183 (M+ - Ph). Found: C, 50.93; H, 7.03. C11H18OSi2F2 requires C, 50.73; H, 6.97.

**Compounds 3d and 4d.** Using the representative procedure, heating **1a** and **2a** in presence of 1/2 Pt2(dba)3 + 5/3P(OCH2)3CEt (2 mol % Pt) at 160 C for 20 h gave a mixture of **3d** (50%) and **4d** (35%). These were separated by preparative GLC. Spectroscopic data for **3d**S1 and **4d**S2 were in accord with the reported literature values.

**Compound 3e.** Bp 110 C /1 mm Hg (Kugelrohr). **H(C6D6) 0.16 (3H, s, Si*Me*), 0.18 (3H, s, Si*Me*), 0.20 (3H, s, Si*Me*), 0.29 (3H, s, Si*Me*), 4.66 (1H, s, Si-C*H-* O), 7.5-7.0 (15H, m, 15H, 3 × Ph). **C (C6D6) -6.1 (Si*Me*), -5.4 (Si*Me*), -1.3 (Si*Me*), -0.9 (Si*Me*), 71.1 (Si*C*HO), 125.7 (2C), 125.8 (2C), 125.9, 127.7 (2C), 127.8 (2C), 129.4, 129.7, 134.0 (2C), 134.9 (2C), 136.7 (*ipso*-C), 138.2 (*ipso*-C), 143.7 (*ipso*-C). **Si (C6D6)-3.9 (O*Si*Me2Ph), 9.5 (C*Si*Me2Ph). IR (neat, cm-1): 1429, 1253, 1108, 1048, 832. MS (EI): *m/z* 284 (M+ - PhMe). Found: C, 73.50; H, 7.65. C23H28OSi2 requires C, 73.35; H, 7.49.

**Compound 3f**. Bp85 C/1 mm Hg (Kugelrohr). **H(C6D6) -0.17 (3H, s, Si*Me*), -0.03 (3H, s, Si*Me*), 0.02 (3H, s, Si*Me*), 0.22 (3H, s, Si*Me*), 0.51-0.89 (4H, m, 2 × SiC*H*2C), 1.62-1.98 (2H, m, 2H, CC*H*2C), 4.60 (1H, s, SiC*H* O), 7.3-7.0 (5H, m, aromatic). **C (C6D6) -7.8 (Si*Me*), -3.4 (Si*Me*), -1.73 (Si*Me*), -1.35 (Si*Me*), 17.4 (C*C*H2C), 19.0 (Si*C*H2C), 19.1(Si*C*H2C), 69.1 (Si*C*HO), 125.0 (2C), 125.7, 128.1 (2C), 143.8 (*ipso*-C). **Si (C6D6) 1.7 (O*Si*Me2), 17.8 (C*Si*Me2). IR (neat, cm-1): 1603, 1493, 1452, 1415, 1251, 1079, 1050, 946. MS (EI): *m/z* 264 (M+), 249 (M+ - Me). Found: C, 63.71; H, 9.24. C14H17OSi2 requires C, 63.57; H, 9.15.

**Compound 3g**. Isolated by preparative GLC.**H(C6D6) 0.01 (3H, d, *J*(H-F) = 6.1 Hz, Si*Me*F), 0.07 (3H, d, *J*(H-F) = 7.2 Hz, Si*Me*F), 0.10 (3H, d, *J*(H-F) = 6.0 Hz, Si*Me*F), 0.21 (3H, d, *J*(H-F) = 7.2 Hz, 3H, Si*Me*F), 3.29 (3H, s, *Me*O), 4.74 (1H, s, FSi-C*H*-O), 7.23-6.9 (4H, m, aromatic). **C (C6D6) - 4.5 (d, *J*(C-F) = 14.0 Hz, Si*Me*F), -4.2 (d, *J*(C-F) = 14.2 Hz, Si*Me*F), -2.9 (d, *J*(C-F) = 18.9 Hz, Si*Me*F), -2.7 (d, *J*(C-F) = 18.0 Hz, Si*Me*F), 54.8 (s, *Me*O), 69.2 (d, *J*(C-F) = 17.0 Hz, FSi*C*HO), 114.3 (2C), 126.6 (2C), 132.9 (*ipso*-C), 158.9 (*ipso*-C-F). **Si (C6D6) 3.4 (d, *J*(Si-F) = 287 Hz, O*Si*Me2F), 22.1 (d, *J*(Si-F) = 292 Hz, C*Si*Me2F). IR ( neat, cm-1): 1603, 1512, 1249, 1065, 874. MS (EI): *m/z* 290 (M+), 275 (M+ - Me), 213 (M+ - Ph). HRMS. Found: 290.0965. C12H20O2Si2F2 requires 290.0968.

**Compound 3h.** Isolated by preparative GLC. **H(C6D6) -0.02 (3H, d, *J*(H-F) = 6.1 Hz, Si*Me*F), 0.05 (3H, d, *J*(H-F) = 7.2 Hz, Si*Me*F), 0.09 (3H, d, *J*(H-F) = 6.0 Hz, 3H, Si*Me*F), 0.20 (3H, d, *J*(H-F) = 7.2 Hz, Si*Me*F), 2.10 (3H, s, *Me*), 4.75 (1H, s, FSi-C*H*-O), 7.2-6.9 (4H, m, aromatic). **C (C6D6) - 4.6 (d, *J*(C-F) = 14.0 Hz, Si*Me*F), -4.3 (d, *J*(C-F) = 14.2 Hz, Si*Me*F), -3.0 (d, *J*(C-F) = 19.2 Hz, Si*Me*F), -2.7 (d, *J*(C-F) 18.2 Hz, Si*Me*F), 20.1 (s, *Me*), 69.4 (d, *J*(C-F) = 17.0 Hz, FSi*C*HO), 125.3 (2C), 129.4 (2C), 136.0 (*ipso*-C), 138.2 (*ipso*-C). **Si (C6D6) 3.5 (d, *J*(Si-F) = 287 Hz, O*Si* Me2F), 22.1 (d, *J*(Si-F) = 292 Hz, C-*Si*Me2F). IR (neat, cm-1): 1514, 1263, 1067, 872. MS (EI): *m/z* 274 (M+). Found: C, 52.49; H, 7.37. C12H20OSi2F2 requires C, 52.51; H, 7.35.

**Compound 3i.** Isolated by preparative GLC. **H(C6D6) -0.08 (3H, d, *J*(H-F) = 6.1 Hz, Si*Me*F), -0.03 (3H, d, *J*(H-F) = 7.2 Hz, Si*Me*F), 0.05 (3H, d, *J*(H-F) = 6.0 Hz, Si*Me*F), 0.14 (3H, d, *J*(H-F) = 7.1 Hz, Si*Me*F), 4.62 (1H, s, FSiC*H* O), 6.7-7.0 (4H, m, aromatic). **C (C6D6) - 4.8 (d, *J*(C-F) = 13.9 Hz, Si*Me*F), -4.3 (d, *J*(C-F) = 14.0 Hz, Si*Me*F), -3.1 (d, *J*(C-F) = 19.6 Hz, Si*Me*F), -2.8 (d, *J*(C-F) = 18.2 Hz, Si*Me*F), 68.7 (d, *J*(C-F) = 17.3 Hz, FSi*C*HO), 115.5 (2C, d, *J*(C-F) = 21.5 Hz,), 126.7 (2C, d, *J*(C-F) = 7.8 Hz), 136.8 (*ipso*-C), 162.0 (d, *J*(C-F) = 245 Hz, *ipso*-C-F). **Si (C6D6) 3.5 (d, *J*(Si-F) = 287 Hz, O*Si*Me2F), 22.2 (d, *J*(Si-F = 292 Hz, C-*Si*Me2F). IR (neat, cm-1): 1605, 1510, 1265, 1224, 1067, 872. MS (EI): *m/z* 278 (M+), 201 (M+ - Ph). Found: C, 47.68; H, 6.18. C11H12OSi2F3 requires C, 47.45; H, 6.15.

**Compound 3j**. Isolated by preparative GLC. **H(C6D6) -0.01 (3H, d, *J*(H-F) = 6.2 Hz, Si*Me*F), 0.07 (3H, d, *J*(H-F) = 6.0 Hz, Si*Me*F), 0.09 (3H, d, *J*(H-F) = 7.1 Hz, Si*Me*F), 0.20 (3H, d, *J*(H-F) = 7.1 Hz, Si*Me*F), 4.95 (1H, s, FSiC*H*O), 6.7-7.2 (4H, m, aromatic). **C (C6D6) -4.5 (d, *J*(C-F) = 13.7 Hz, Si*Me*F), -4.3 (d, *J*(C-F) = 13.7 Hz, Si*Me*F), -3.1 (d, *J*(C-F) = 18.8 Hz, Si*Me*F), -2.7 (d, *J*(C-F) = 18.1 Hz, Si*Me*F), 65.7 (d, *J*(C-F) = 18 Hz, FSi*C*HO), 122.9, 124.0, 127.2, 134.1. **Si (C6D6) -1.0 (d, *J*(Si-F) = 290 Hz, O*Si*Me2F), 21.9 (d, *J*(Si-F) = 291 Hz, C*Si*Me2F). IR (neat, cm-1): 1499, 1259, 1050, 910. MS (EI): *m/z* 266 (M+). HRMS. Found: 266.0462. C9H16OSi2SF2 requires 266.0429.

**Compound 7a.** Isolated by preparative GLC. **H(C6D6) 0.06 (3H, d, *J*(H-F) = 6.7 Hz, Si*Me*F), 0.08 (3H, d, *J*(H-F) = 6.7 Hz, Si*Me*F), 0.17 (3H, d, *J*(H-F) = 7.6 Hz, Si*Me*F), 0.18 (3H, d, *J*(H-F) = 7.7 Hz, Si*Me*F), 2.52 (3H, m, N*Me*), 3.87 (1H, d, *J*(H-F) = 7.8 Hz, C*H*), 7.0-7.4 (5H, m, aromatic). **C (C6D6) -2.73 (d, *J*(C-F) = 21.0 Hz, Si*Me*F), -2.68 (d, *J*(C-F) = 22.1 Hz, Si*Me*F), -1.4 (d, *J*(C-F) = 14.0 Hz, Si*Me*F), -1.1 (d, *J*(C-F) = 14.0 Hz, Si*Me*F), 33.4 (N*Me*), 54.1 (d, *J*(C-F) = 14.5 Hz, Si*C*HN), 126.1 (2C), 128.0, 128.8 (2C), 141.3 (*ipso*-C). IR (neat, cm-1): 1649, 1491, 1452, 1265, 1058. MS (EI): *m/z* 273 (M+), 196 (M+ - Ph). Found: C, 50.59; H, 7.12; N, 5.24. C12H21NSi2F2 requires C, 51.12; H, 7.02; N, 5.42.

**Compound 7b.** Isolated by preparative GLC. **H (C6D6) 0.17 (3H, d, *J*(H-F) = 6.0 Hz, Si*Me*F), 0.18 (3H, d, *J*(H-F) = 6.1 Hz, Si*Me*F), 0.20 (3H, d, *J*(H-F) = 7.5 Hz, 3H, Si*Me*F), 0.26 (3H, d, *J*(H-F) = 7.2 Hz, Si*Me*F), 0.76 (3H, m, *Me*), 1.0-1.3 (2H, m, C*H*2), 1.26-1.41 (2H, m, C*H*2), 2.8 (2H, m, NC*H*2), 3.8 (1H, d, *J*(H-F) = 7.5 Hz, C*H*), 7.0-7.4 (5H, m, aromatic). **C (C6D6) -1.44 (d, *J*(C-F) = 20.8 Hz, Si*Me*F), -1.4 (d, *J*(C-F) = 16.9 Hz, Si*Me*F), -1.26 (d, *J*(C-F) = 21.6 Hz, Si*Me*F), -1.21 (d, *J*(C-F) = 17.3 Hz, Si*Me*F) 14.0, 20.6, 34.3, 48.3, 55.5 (d, *J*(C-F) = 14.1 Hz, Si*C*H-), 126.7 (2C), 128.7, 128.9 (2C), 142.2 (*ipso*-C). **Si C6D6)6.8 (d, *J*(Si-F) = 280 Hz, N*Si*Me2F), 28.3 (d, *J*(Si-F) = 293 Hz, C*Si*Me2F). IR (neat, cm-1): 2965, 2886, 1601, 1261, 1116, 864. HRMS. Found: 315.1652. C15H27NSi2F2 requires 315.1651.

**Compound 8a**. The general procedure was followed using **1d** (0.5 mmol) and **6a** (2.0 mmol). Product was isolated by preparative GLC. **H (C6D6) 0.34 (9H, s, Si*Me*3), 3.52 (3H, d, *J*(H-H) = 1.3 Hz, N*Me* ), 7.35-7.44 (2H, m, aromatic), 7.56-7.60 (1H, m, aromatic), 7.85-7.91 (1H, m, aromatic), 8.57 (d, *J*(H-H) = 1.3 Hz, C*H*=N). **C (C6D6) 0.9 (3C, Si*Me*3), 48.1 (N*Me* ), 127.3, 129.3 (2C), 134.7, 140 (*ipso*-C), 141.6 (*ipso*-C), 162.9 (*C*=N). **Si (C6D6) -4.77. IR (neat, cm-1): 2956, 2886, 1665, 1649, 1253, 841. MS (EI): *m/z* 191 (M+),176 (M+ - Me). HRMS. Found: 191.1106. C11H17NSi requires 191.1130.

**Compound 8b**. Isolated by preparative GLC. **H (C6D6) 0.29 (9H, s, Si*Me*3), 0.88 (3H, m, CH2C*H*3), 1.35 (2H, m, C*H*2), 1.68 (2H, m, C*H*2), 3.50 (2H, m, NC*H*2), 7.59 (1H, m, aromatic), 7.77 (1H, m, aromatic), 7.78-7.98 (2H, aromatic), 8.42 (1H, s, C*H*=N). **C (C6D6) 1.4 (3C, Si*Me*3), 14.0 (*C*H3), 20.8 (*C*H2), 33.2 (*C*H2), 61.6 (N*C*H2), 127.5, 129.2 (2C), 135.5, 140.2 (*ipso*-C), 141.8 (*ipso*-C), 161.1 (*C*H=N). **Si (C6D6) -4.90. MS (EI): *m/z* 233 (M+), 218 (M+ - Me). HRMS. Found: 233.1575. C14H23NSi requires 233.1599.

**Compound 8d.** Isolated by preparative GLC. **H (C6D6) 0.56 (6H, s, 2 × Si*Me*), 3.54 (d, *J*(H-H) = 1.3 Hz, N*Me* ), 7.3-7.9 (m, 9H, 2 aromatic rings), 8.59 (1H, d, *J*(H-H) = 1.3 Hz, C*H*=N). **C (C6D6) -4.8 (Si*Me*Ph), 49.0 (N*Me*), 127.4 (2C), 127.7, 128.5, 128.7, 129.7, 133.7, 134.1 (2C), 138.0, 138.4, 142.9, 163.2 (*C*=N). **Si (C6D6) -6.8. IR (neat, cm-1): 1678, 1640, 1254, 837. MS (EI): *m/z* 253 (M+), 238 (M+ - Me), 176 (M+ - Ph), 85. HRMS. Found: 253.1269. C16H19NSi requires 253.1287

**Compound 8e.** The general procedure was followed using **1d** (1 mmol) and **6e** (0.5 mmol). Product was isolated by preparative GLC. **H ( C6D6) 0.34 (9H, s, Si*Me*3), 2.37 (3H, s, C*Me*), 3.50 (3H, d, *J*(H-H) = 1.3 Hz, N*Me*), 7.21 (1H, d, aromatic), 7.36 (1H, s, aromatic), 7.79 (d, 1H, aromatic), 8.54 (d, *J*(H-H) = 1.3 Hz, C*H*=N). **C (C6D6) 0.9 (3C, Si*Me*3), 21.5 (C*Me* ), 48.1 (N*Me* ), 127.2, 130.1, 135.4, 138.9 (*ipso*-C), 139.1 (*ipso*-C), 140.0 (*ipso*-C), 162.7 (*C*H=N). **Si (C6D6) -4.90. IR (neat, cm-1): 2956, 2886, 1665, 1640, 1250, 850. MS (EI): *m/z* 205 (M+),190 (M+ -Me). Found: C, 70.30; H, 9.39; N, 6.76. C12H19NSi requires C, 70.18; H, 9.32; N, 6.82.

**Compound 8f.** The general procedure was followed using **1d** (1 mmol) and **6f** (0.5 mmol). Product was isolated by preparative GLC. **H (C6D6) 0.34 (9H, s, Si*Me*3), 3.50 (3H, d, *J*(H-H) = 1.6 Hz, N*Me* ), 7.06 (m, 1H, aromatic), 7.24 (1H, m, aromatic), 7.86 (1H, m, aromatic), 8.50 (1H, q, *J*(H-H) = 1.6 Hz, C*H*=N). **C (C6D6) 0.65 (3C, Si*Me*3), 47.9 (N*Me* ), 116.1 (d, 2*J*(C-F)= 21.6 Hz, aromatic), 121.2 (d, 2*J*(C-F)= 19.6 Hz, aromatic), 129.6 (d, 3*J*(C-F)= 7.7 Hz, aromatic), 137.6 (*ipso*-C), 143.6 (*ipso*-C), 161.5 (*C*H=N), 165.3 (d, *J*(C-F)= 252 Hz, C-F). **Si (C6D6) -4.30. IR (neat, cm-1): 2955, 2894, 1661, 1252, 840. MS (EI): *m/z* 209 (M+). HRMS. Found: 209.1043. C11H16NsiF requires 209.1035.

**Compound 9a**. The general procedure was followed using **1d** (2.0 mmol) and **6a** (0.5 mmol). Product was isolated by preparative GLC. **H (C6D6) 0.29 (18H, s, 2 × Si*Me*3), 3.49 (3H, d, *J*(H-H) = 1.3 Hz, N*Me* ), 7.36 (1H, t, *J*(H-H) = 7.4 Hz, aromatic), 7.62 (2H, d, *J*(H-H) = 7.4 Hz, aromatic), 8.68 (1H, q, *J*(H-H) = 1.3 Hz, 1H, C*H*=N). **C (C6D6) 1.25 (6C, Si*Me*3), 47.0 (N*Me*), 127.6, 135.8 (2C), 139.3 (2C, C-Si), 148.0 (*ipso*-C), 164.3 (*C*=N). **Si (C6D6) -5.3. IR (KBr disk, cm-1): 2960, 2902, 1661, 1251, 874, 835. MS (EI): *m/z* 263 (M+, 1) 248 (M+ - Me, 100). Found: C, 63.64; H, 9.69; N, 5.22. C14H25NSi2 requires C, 63.81; H, 9.56; N, 5.31.

**Compound 9e.** The general procedure was followed using **1d** (1.0 mmol) and **6e** (0.5 mmol). Product was isolated by preparative GLC. **H (C6D6) 0.29 (s, 18H, 2Si*Me*3), 2.37 (3H, s, C*Me*), 3.47 (3H, d, *J*(H-H) = 1.5 Hz, N*Me* ), 7.43 (2H, s, aromatic), 8.65 (1H, q, *J*(H-H) = 1.5 Hz, C*H*=N). **C (C6D6) 1.32 (6C, Si*Me*3), 21.6 (C*Me* ), 46.9 (N*Me*), 136.6 (2C), 137.2, 139.1 (2C, C-Si), 148.0 (*ipso*-C), 163.9 (*C*=N). **Si (C6D6) -5.7. IR (KBr disk, cm-1): 2950, 2890, 1667, 1250, 880, 830. MS (EI): *m/z* 277 (M+), 262 (M+ - Me). Found: C, 64.96; H, 9.75; N, 5.01. C15H27NSi2 requires C, 64.91; H, 9.80; N, 5.04.

**Compound 9f.** The general procedure was followed using **1d** (1.0 mmol) and **6f** (0.5 mmol). Product was isolated by preparative GLC. **H (C6D6) 0.29 (18H, s, 2 × Si*Me*3, 3.47 (3H, d, *J*(H-H) = 1.5 Hz, N*Me*), 7.27 (2H, d,

*J*(H-F) = 9.2 Hz, aromatic), 8.61 (1H, q, *J*(H-H) = 1.5 Hz, C*H*=N). **C (C6D6) 1.1 (6C, Si*Me*3), 46.7 (N*Me*), 122.1 (2C, d, *J*(C-F) = 19.4 Hz), 143.3 (2C, d, *J*(C-F) = 3.6 Hz, *C*Si), 162.8 (*C*=N), 162.9 (d, *J*(C-F) = 253 Hz, *C*F). **Si (C6D6) -5.2. IR (KBr disk,

cm-1): 2951, 2888, 1649, 1251, 865, 835. MS (EI): *m/z* 281 (M+), 266 (M+ - Me). Found: C, 59.76; H 8.64; N, 5.05. C14H24NSi2F requires C, 59.73; H, 8.59; N, 4.98.

**References**

S1 A. Wright and R. West, *J. Am. Chem. Soc.,* 1974, **96**, 3214.

S2 G. Neumann and W. P. Neumann, *J. Organomet. Chem.,* 1972, **42**, 277.
